# Supplementary material
Source: PubMed Central journal article supplement (PMC7965117)
Supplement: 3427_tables.pdf [file 3427_tables.pdf]

**On-line Table 1: Description of cortical and sulcation abnormalities in 40 patients**

| Patient | Description                                                                                                                                                                                                                                      |
|---------|--------------------------------------------------------------------------------------------------------------------------------------------------------------------------------------------------------------------------------------------------|
| 1       | Bilateral schizencephaly, extensive fcd, abnormal Sylvian fissures                                                                                                                                                                               |
| 2       | Abnormal R intraparietal-occipital sulcus and open sylvian fissures, sylvian cortex and R occipital cortex                                                                                                                                       |
| 3       | Unusual sulcation R postcingulate and transmantle bands to Sylvian fissures                                                                                                                                                                      |
| 4       | Bilateral peri-Sylvian pmg, abnormal Sylvian fissures, thick and blurred cortex                                                                                                                                                                  |
| 5       | Dysplastic L cingulate adjacent to transmantle dysplasia                                                                                                                                                                                         |
| 6       | Transmantle band left frontal and above right caudate                                                                                                                                                                                            |
| 7       | L frontal transmantle band                                                                                                                                                                                                                       |
| 8       | Abnormal Sylvian fissures, L > R                                                                                                                                                                                                                 |
| 9       | R posterior quadrantic dysplasia, abnormal posterior sulcation and R Sylvian fissure, linear band                                                                                                                                                |
| 10      | Abnormal L Sylvian fissure                                                                                                                                                                                                                       |
| 11      | Linear bands from posterior atrium to occipital white matter, unusual stellate sulcal configuration joining R intraparietal sulcus                                                                                                               |
| 12      | Short Sylvian fissures, absent L intra-parieto-occipital fissure and simplified gyral pattern, areas of increased cortical thickness                                                                                                             |
| 13      | Unusual sulcation R postcentral—thick but only 3 years of age terminal zones                                                                                                                                                                     |
| 14      | Abnormal L Sylvian fissure, abnormal sulcus from L frontal lobe joins it with stellate shape                                                                                                                                                     |
| 15      | Dysplastic cingulate gyrus R abnormal L calcarine with branching, N thickness, still young                                                                                                                                                       |
| 16      | Abnormal Sylvian fissures bilaterally, elongated with terminal branches; difficult to assess thickness because not myelinated yet                                                                                                                |
| 17      | Abnormal L Sylvian fissure                                                                                                                                                                                                                       |
| 18      | Thick gray linear transmantle bands from nodules to adjacent Sylvian cortex, thickened but no pmg                                                                                                                                                |
| 19      | Unusual sulcation R posterior, abnormal Sylvian fissures bilateral L > R                                                                                                                                                                         |
| 20      | Cortical malformation R Sylvian/central, even on fetal scan and postnatal at 8 days of age, unusual sulcation, impression of regions of cortical malformation                                                                                    |
| 21      | Abnormal Sylvian fissures bilaterally, pmg perisylvian, and anterior cingulates, and absent intra-parieto-occipital sulci bilaterally, transmantle bands/VR spaces to overlying cortex                                                           |
| 22      | R posterior quadrant dysplasia, abnormal R intraoccipital and calcarine sulcus, schizencephalic cleft                                                                                                                                            |
| 23      | Transmantle bands in region of R giant perivascular spaces (parieto-occipital), hypothalamic hamartoma, unusual sulcation L anterior                                                                                                             |
| 24      | Difficult because only 24 weeks' gestation but appropriate fissures seen, borderline Sylvian biometry                                                                                                                                            |
| 25      | Thick cortex/linear transmantle bands posterior cingulate, Sylvian, absent parieto-occipital fissures bilaterally, unusual R anterior temporal sulcation; R central and precentral sulci have stellate radiating sulci, linear transmantle bands |
| 26      | Transmantle dysplasias, R cingulate, L calcarine sulcus, unusual L temporal lobe sulci and L intra-parieto-occipital sulcus                                                                                                                      |
| 27      | Abnormal posterior cingulates (partial ACC), transmantle linear bands                                                                                                                                                                            |
| 28      | L transmantle and subcortical heterotopias occipital/parietal/calcarine; absent L intra-parieto-occipital sulcus, abnormal Sylvian fissures, linear bands R                                                                                      |
| 29      | Linear transmantle bands                                                                                                                                                                                                                         |
| 30      | Linear transmantle bands                                                                                                                                                                                                                         |
| 31      | Dysplastic L calcarine/occipital gyri, with transmantle bands to nodules and suspected schizencephaly L occipital horn posteriorly, abnormal L central sulcus, L sts, fusiform gyrus, dysplasia L temporal and occipital lobes                   |
| 32      | Bilateral perisylvian pmg, intra-parieto-occipital cortex linear bands from nodules                                                                                                                                                              |
| 33      | Abnormal Sylvians bilaterally and linear transmantle bands                                                                                                                                                                                       |
| 34      | Thick cortex in perisylvian regions, abnormal orientation R Sylvian fissure                                                                                                                                                                      |
| 35      | Bilateral occipital pmg, dysplastic cingulate (ACC), abnormal temporal lobe sulcation, also schizencephalic clefts to posterior horns                                                                                                            |
| 36      | Unusual R frontal sulcation, bilateral linear transmantle bands to cortex                                                                                                                                                                        |
| 37      | Abnormal L Sylvian fissure, also transmantle linear bands                                                                                                                                                                                        |
| 38      | Bilateral cortical dysplasia, L>R<- large transmantle heterotopia                                                                                                                                                                                |
| 39      | Abnormal R medial temporal sulcation and transmantle bands from nodules                                                                                                                                                                          |
| 40      | Abnormal R Sylvian fissure                                                                                                                                                                                                                       |

**Note:**—R indicates right; L, left; L>R, left more than right side; pmg, polymicrogyria; ACC, agenesis of the corpus callosum; N, normal; sts, superior temporal sulcus; fcd, focal cortical dysplasia; VR, Virchow–Robin.

**On-line Table 2: Intrafamilial imaging findings**

|         | Cerebellum<br>Abnormality | PCF Cyst | Colpocephaly | Corpus Callosum<br>Abnormality | Cortex/Sulcation<br>Abnormality | Hippocampal<br>Abnormality |
|---------|---------------------------|----------|--------------|--------------------------------|---------------------------------|----------------------------|
| 1a Twin | +                         | +        | +            | +                              | +                               | -                          |
| 1b      | +                         | +        | +            | +                              | +                               | +                          |
| 2a      | +                         | +        | +            | +                              | -                               | +                          |
| 2b      | -                         | -        | +            | +                              | -                               | +                          |
| 3a      | +                         | +        | +            | +                              | +                               | +                          |
| 3b      | +                         | +        | -            | -                              | -                               | +                          |
| 4a      | -                         | +        | -            | -                              | +                               | -                          |
| 4b      | +                         |          | +            | +                              | +                               | +                          |

**Note:**—PCF indicates posterior cranial fossa; +, present (abnormal); -, absent (normal).
